# Supplementary material for: Oxygen Defects Containing TiN Films for the Hydrogen Evolution Reaction: A Robust Thin-Film Electrocatalyst with Outstanding Performance
Source: MDPI journal article supplement (doi:10.3390/nano14090770), 2024-04-27
Supplement: s1 [file s1]

## Supplementary Materials

# Oxygen Defects Containing TiN Films for the Hydrogen Evolution Reaction: A Robust Thin-Film Electrocatalyst with Outstanding Performance

Ayoub Laghrissi <sup>1</sup> and Mohammed Es-Souni <sup>2,\*</sup>

<sup>1</sup> Currently at Mads Clausen Institute, University of Southern Denmark, 6400 Sønderborg, Denmark; laghris-si@mci.sdu.dk

<sup>2</sup> Institute of Materials and Surface Technology, Honorary Member of Kiel University of Applied Sciences, 24249 Kiel, Germany

\* Correspondence: mohammed.es-souni@fh-kiel.de

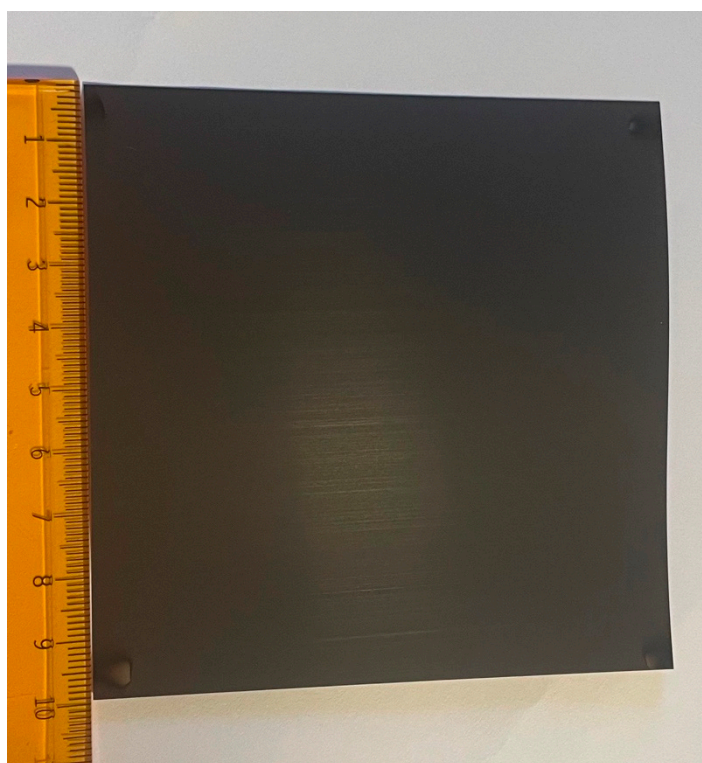

**Figure S1:** a photograph of a large area TiNO film deposited on a Ti sheet.

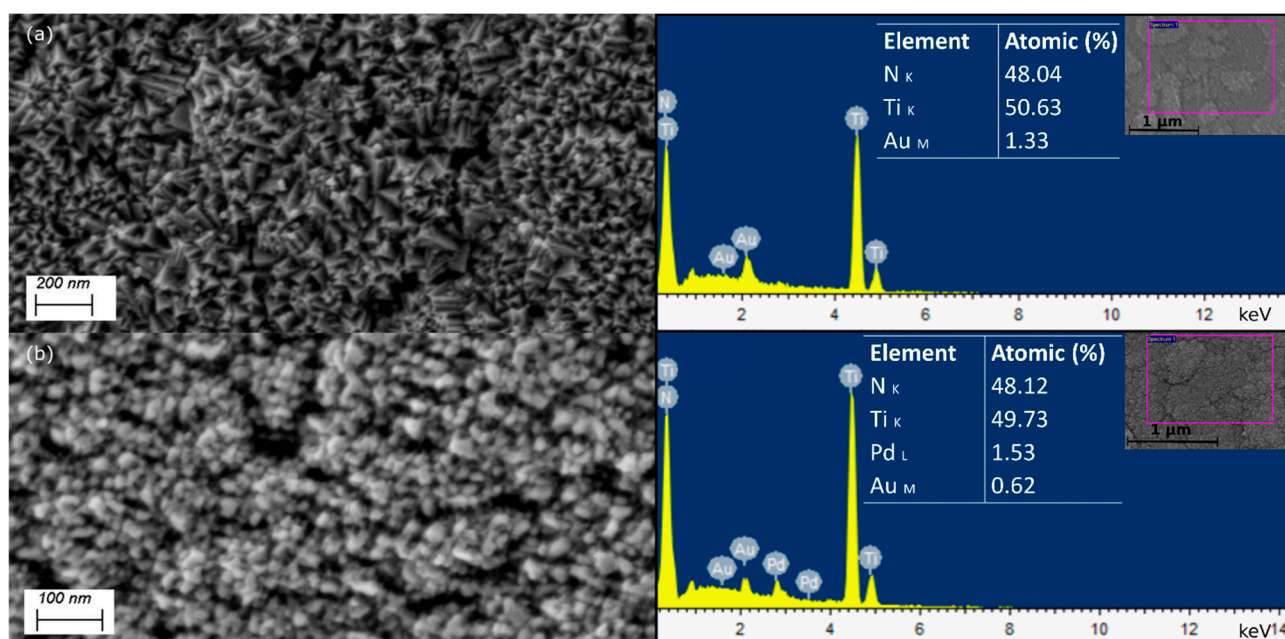

**Figure S2:** Top view secondary electron (SE) micrographs of TiN (a) and TiN-PdNPs (b) together with their EDS analysis after HER studies.
